# Supplementary material
Source: publisher figshare collection journal article supplement (https://asha.figshare.com/articles/dataset/_/12798080)
Supplement: Supplementary file 1 [file 1]

## Supplemental Material S1. Search strategies.

The search strategies for the electronic databases MEDLINE (using the PubMed Interface), Web of Science, and Embase.

### MEDLINE (using the PubMed interface)

"Aphasia, Primary Progressive" [Mesh] OR "progressive aphasia" [TIAB] OR "progressive aphasias" [TIAB] OR "progressive language disorder" [TIAB] OR "progressive language disorders" [TIAB] OR "PPA-syndrome" [TIAB] OR "progressive nonfluent aphasia" [TIAB] OR "progressive nonfluent aphasias" [TIAB] OR "progressive non-fluent aphasia" [TIAB] OR "progressive non-fluent aphasias" [TIAB] OR "nonfluent-PPA" [TIAB] OR "non-fluent-PPA" [TIAB] OR "PNFA" [TIAB] OR "nonfluent-variant PPA" [TIAB] OR "non-fluent-variant PPA" [TIAB] OR "nfv-PPA" [TIAB] OR "nfvPPA" [TIAB] OR "nfa-PPA" [TIAB] OR "nfaPPA" [TIAB] OR "progressive agrammatic aphasia" [TIAB] OR "progressive agrammatic aphasias" [TIAB] OR "agrammatic-PPA" [TIAB] OR "agrammatic-variant PPA" [TIAB] OR "PPA-G" [TIAB] OR "semantic dementia" [TIAB] OR "semantic dementias" [TIAB] OR "progressive semantic aphasia" [TIAB] OR "progressive semantic aphasias" [TIAB] OR "semantic-PPA" [TIAB] OR "semantic-variant PPA" [TIAB] OR "sv-PPA" [TIAB] OR "svPPA" [TIAB] OR "PPA-S" [TIAB] OR "logopenic aphasia" [TIAB] OR "logopenic aphasias" [TIAB] OR "logopenic-PPA" [TIAB] OR "logopenic-variant PPA" [TIAB] OR "lv-PPA" [TIAB] OR "lvPPA" [TIAB] OR "PPA-L" [TIAB] OR "progressive mixed aphasia" [TIAB] OR "progressive mixed aphasias" [TIAB] OR "mixed-PPA" [TIAB] OR "mixed-variant PPA" [TIAB] OR "progressive fluent aphasia" [TIAB] OR "progressive fluent aphasias" [TIAB] OR "fluent-PPA" [TIAB] OR "fluent-variant PPA" [TIAB] OR "progressive expressive aphasia" [TIAB] OR "progressive expressive aphasias" [TIAB] OR "expressive-PPA" [TIAB] OR "expressive-variant PPA" [TIAB] OR "progressive motor aphasia" [TIAB] OR "progressive motor aphasias" [TIAB] OR "motor-PPA" [TIAB] OR "motor-variant PPA" [TIAB] OR "progressive anomic aphasia" [TIAB] OR "progressive anomic aphasias" [TIAB] OR "anomic-PPA" [TIAB] OR "anomic-variant PPA" [TIAB] OR "progressive global aphasia" [TIAB] OR "progressive global aphasias" [TIAB] OR "global-PPA" [TIAB] OR "global-variant PPA" [TIAB] OR "progressive sensory aphasia" [TIAB] OR "progressive sensory aphasias" [TIAB] OR "sensory-PPA" [TIAB] OR "sensory-variant PPA" [TIAB] OR "progressive dynamic aphasia" [TIAB] OR "progressive dynamic aphasias" [TIAB] OR "dynamic-PPA" [TIAB] OR "dynamic-variant PPA" [TIAB] OR "progressive fluent anomic aphasia" [TIAB] OR "progressive fluent anomic aphasias" [TIAB] OR "progressive anomia" [TIAB] OR "progressive anomias" [TIAB] OR "aphasic dementia" [TIAB] OR "aphasic dementias" [TIAB] OR "progressive speech disorder" [TIAB] OR "progressive speech disorders" [TIAB] OR "progressive aphemia" [TIAB] OR "progressive aphemias" [TIAB] OR "progressive anarthria" [TIAB] OR "progressive anarthrias" [TIAB] OR "progressive apraxia" [TIAB] OR "progressive apraxias" [TIAB] OR "progressive AOS" [TIAB] OR "PPAOS" [TIAB] OR "progressive dysarthria" [TIAB] OR "progressive dysarthrias" [TIAB] OR "temporal-variant frontotemporal dementia" [TIAB] OR "temporal-variant of frontotemporal dementia" [TIAB] OR "temporal-variant FTD" [TIAB] OR "temporal-variant of FTD" [TIAB] OR "tv-FTD" [TIAB] OR "tvFTD" [TIAB] OR "temporal-variant frontotemporal lobar degeneration" [TIAB] OR "temporal-variant of frontotemporal lobar degeneration" [TIAB] OR "temporal-variant FTLD" [TIAB] OR "temporal-variant of FTLD" [TIAB] OR "tv-FTLD" [TIAB] OR "tvFTLD" [TIAB]

AND

"Early Diagnosis" [Mesh:NoExp] OR "early" [TIAB] OR "earlier" [TIAB] OR "earliest" [TIAB] OR "mild" [TIAB] OR initial\* [TIAB] OR "first stage" [TIAB] OR "first stages" [TIAB] OR "first symptom" [TIAB] OR "first symptoms" [TIAB] OR "phase" [TIAB] OR "phases" [TIAB] OR "stage" [TIAB] OR "stages" [TIAB] OR "staging" [TIAB] OR "onset" [TIAB] OR "Longitudinal Studies" [Mesh:NoExp] OR "longitudinal" [TIAB] OR "Disease Progression" [Mesh] OR

"progression" [TIAB] OR "course" [TIAB] OR "courses" [TIAB] OR "trajectory" [TIAB] OR "trajectories" [TIAB] OR "Follow-Up Studies" [Mesh] OR "follow-up" [TIAB] OR "followup" [TIAB] OR "evolution" [TIAB] OR "case" [TIAB] OR "cases" [TIAB] OR "Case Reports" [Publication Type] OR "Language Tests" [Mesh] OR "Speech Production Measurement" [Mesh] OR "assessment" [TIAB] OR "assessments" [TIAB] OR "test" [TIAB] OR "tests" [TIAB] OR "examination" [TIAB] OR "examinations" [TIAB] OR "evaluation" [TIAB] OR "evaluations" [TIAB] OR "description" [TIAB] OR "descriptions" [TIAB] OR "battery" [TIAB] OR "batteries" [TIAB] OR "profile" [TIAB] OR "profiles" [TIAB] OR "measure" [TIAB] OR "measures" [TIAB] OR "measurement" [TIAB] OR "measurements" [TIAB] OR "self-report" [TIAB] OR "self-reports" [TIAB] OR "interview" [TIAB] OR "interviews" [TIAB] OR "questionnaire" [TIAB] OR "questionnaires" [TIAB] OR "scale" [TIAB] OR "scales" [TIAB] OR "inventory" [TIAB] OR "inventories" [TIAB] OR "checklist" [TIAB] OR "checklists" [TIAB] OR "Evoked Potentials" [Mesh] OR "potential" [TIAB] OR "potentials" [TIAB] OR "event-related response" [TIAB] OR "event-related responses" [TIAB] OR "evoked response" [TIAB] OR "evoked responses" [TIAB] OR "ERP" [TIAB] OR "ERPs" [TIAB] OR "P3" [TIAB] OR "P300" [TIAB] OR "mismatch" [TIAB] OR "MMN" [TIAB] OR "oddball" [TIAB] OR "odd-ball" [TIAB] OR "N400" [TIAB] OR "anterior negativity" [TIAB] OR "P600" [TIAB] OR "positive shift" [TIAB] OR "AEP" [TIAB] OR "AEPs" [TIAB] OR "P1" [TIAB] OR "P100" [TIAB] OR "N1" [TIAB] OR "N100" [TIAB] OR "P2" [TIAB] OR "P200" [TIAB] OR "N2" [TIAB] OR "N200" [TIAB] OR "Electroencephalography" [Mesh] OR electroencephalogra\* [TIAB] OR encephalogra\* [TIAB] OR "EEG" [TIAB] OR "Magnetoencephalography" [Mesh] OR magnetoencephalogra\* [TIAB] OR "MEG" [TIAB] OR "Electrophysiology" [Mesh:NoExp] OR electrophysiolog\* [TIAB] OR "Neurophysiology" [Mesh] OR neurophysiolog\* [TIAB]

## Web of Science

TS=("progressive aphasia") OR TS=("progressive aphasias") OR TS=("progressive language disorder") OR TS=("progressive language disorders") OR TS=("PPA-syndrome") OR TS=("progressive nonfluent aphasia") OR TS=("progressive nonfluent aphasias") OR TS=("progressive non-fluent aphasia") OR TS=("progressive non-fluent aphasias") OR TS=("nonfluent-PPA") OR TS=("non-fluent-PPA") OR TS=("PNFA") OR TS=("nonfluent-variant PPA") OR TS=("non-fluent-variant PPA") OR TS=("nfv-PPA") OR TS=("nfvPPA") OR TS=("nfa-PPA") OR TS=("nfaPPA") OR TS=("progressive agrammatic aphasia") OR TS=("progressive agrammatic aphasias") OR TS=("agrammatic-PPA") OR TS=("agrammatic-variant PPA") OR TS=("PPA-G") OR TS=("semantic dementia") OR TS=("semantic dementias") OR TS=("progressive semantic aphasia") OR TS=("progressive semantic aphasias") OR TS=("semantic-PPA") OR TS=("semantic-variant PPA") OR TS=("sv-PPA") OR TS=("svPPA") OR TS=("PPA-S") OR TS=("logopenic aphasia") OR TS=("logopenic aphasias") OR TS=("logopenic-PPA") OR TS=("logopenic-variant PPA") OR TS=("lv-PPA") OR TS=("lvPPA") OR TS=("PPA-L") OR TS=("progressive mixed aphasia") OR TS=("progressive mixed aphasias") OR TS=("mixed-PPA") OR TS=("mixed-variant PPA") OR TS=("progressive fluent aphasia") OR TS=("progressive fluent aphasias") OR TS=("fluent-PPA") OR TS=("fluent-variant PPA") OR TS=("progressive expressive aphasia") OR TS=("progressive expressive aphasias") OR TS=("expressive-PPA") OR TS=("expressive-variant PPA") OR TS=("progressive motor aphasia") OR TS=("progressive motor aphasias") OR TS=("motor-PPA") OR TS=("motor-variant PPA") OR TS=("progressive anomic aphasia") OR TS=("progressive anomic aphasias") OR TS=("anomic-PPA") OR TS=("anomic-variant PPA") OR TS=("progressive global aphasia") OR TS=("progressive global aphasias") OR TS=("global-PPA") OR TS=("global-variant PPA") OR TS=("progressive sensory aphasia") OR TS=("progressive sensory aphasias") OR TS=("sensory-PPA") OR TS=("sensory-variant PPA") OR TS=("progressive dynamic aphasia") OR TS=("progressive dynamic aphasias") OR TS=("dynamic-PPA") OR TS=("dynamic-variant PPA") OR TS=("progressive fluent anomic aphasia") OR TS=("progressive fluent anomic aphasias") OR TS=("progressive anomia") OR TS=("progressive

anomias") OR TS=("aphasic dementia") OR TS=("aphasic dementias") OR TS=("progressive speech disorder") OR TS=("progressive speech disorders") OR TS=("progressive aphemia") OR TS=("progressive aphemias") OR TS=("progressive anarthria") OR TS=("progressive anarthrias") OR TS=("progressive apraxia") OR TS=("progressive apraxias") OR TS=("progressive AOS") OR TS=("PPAOS") OR TS=("progressive dysarthria") OR TS=("progressive dysarthrias") OR TS=("temporal-variant frontotemporal dementia") OR TS=("temporal-variant of frontotemporal dementia") OR TS=("temporal-variant FTD") OR TS=("temporal-variant of FTD") OR TS=("tv-FTD") OR TS=("tvFTD") OR TS=("temporal-variant frontotemporal lobar degeneration") OR TS=("temporal-variant of frontotemporal lobar degeneration") OR TS=("temporal-variant FTLD") OR TS=("temporal-variant of FTLD") OR TS=("tv-FTLD") OR TS=("tvFTLD")

AND

TS=("early") OR TS=("earlier") OR TS=("earliest") OR TS=("mild") OR TS=("initial\*") OR TS=("first stage") OR TS=("first stages") OR TS=("first symptom") OR TS=("first symptoms") OR TS=("phase") OR TS=("phases") OR TS=("stage") OR TS=("stages") OR TS=("staging") OR TS=("onset") OR TS=("longitudinal") OR TS=("progression") OR TS=("course") OR TS=("courses") OR TS=("trajectory") OR TS=("trajectories") OR TS=("follow-up") OR TS=("followup") OR TS=("evolution") OR TS=("case") OR TS=("cases") OR TS=("assessment") OR TS=("assessments") OR TS=("test") OR TS=("tests") OR TS=("examination") OR TS=("examinations") OR TS=("evaluation") OR TS=("evaluations") OR TS=("description") OR TS=("descriptions") OR TS=("battery") OR TS=("batteries") OR TS=("profile") OR TS=("profiles") OR TS=("measure") OR TS=("measures") OR TS=("measurement") OR TS=("measurements") OR TS=("self-report") OR TS=("self-reports") OR TS=("interview") OR TS=("interviews") OR TS=("questionnaire") OR TS=("questionnaires") OR TS=("scale") OR TS=("scales") OR TS=("inventory") OR TS=("inventories") OR TS=("checklist") OR TS=("checklists") OR TS=("potential") OR TS=("potentials") OR TS=("ERP") OR TS=("ERPs") OR TS=("event-related response") OR TS=("event-related responses") OR TS=("evoked response") OR TS=("evoked responses") OR TS=("P3") OR TS=("P300") OR TS=("mismatch") OR TS=("MMN") OR TS=("oddball") OR TS=("odd-ball") OR TS=("N400") OR TS=("anterior negativity") OR TS=("P600") OR TS=("positive shift") OR TS=("AEP") OR TS=("AEPs") OR TS=("P1") OR TS=("P100") OR TS=("N1") OR TS=("N100") OR TS=("P2") OR TS=("P200") OR TS=("N2") OR TS=("N200") OR TS=("electroencephalogra\*") OR TS=("encephalogra\*") OR TS=("EEG") OR TS=("magnetoencephalogra\*") OR TS=("MEG") OR TS=("electrophysiolog\*") OR TS=("neurophysiolog\*")

#### **Embase (via the Embase.com interface)**

'Primary Progressive Aphasia'/exp OR (progressive NEXT/4 aphasia):ab,ti,kw OR (progressive NEXT/4 aphasias):ab,ti,kw OR 'progressive language disorder':ab,ti,kw OR 'progressive language disorders':ab,ti,kw OR 'PPA-syndrome':ab,ti,kw OR 'nonfluent-PPA':ab,ti,kw OR 'non-fluent-PPA':ab,ti,kw OR 'PNFA':ab,ti,kw OR 'nonfluent-variant PPA':ab,ti,kw OR 'non-fluent-variant PPA':ab,ti,kw OR 'nfv-PPA':ab,ti,kw OR 'nfvPPA':ab,ti,kw OR 'nfa-PPA':ab,ti,kw OR 'nfaPPA':ab,ti,kw OR 'agrammatic-PPA':ab,ti,kw OR 'agrammatic-variant PPA':ab,ti,kw OR 'PPA-G':ab,ti,kw OR 'semantic dementia':ab,ti,kw OR 'semantic dementias':ab,ti,kw OR 'semantic-PPA':ab,ti,kw OR 'semantic-variant PPA':ab,ti,kw OR 'sv-PPA':ab,ti,kw OR 'svPPA':ab,ti,kw OR 'PPA-S':ab,ti,kw OR 'logopenic aphasia':ab,ti,kw OR 'logopenic aphasias':ab,ti,kw OR 'logopenic-PPA':ab,ti,kw OR 'logopenic-variant PPA':ab,ti,kw OR 'lv-PPA':ab,ti,kw OR 'lvPPA':ab,ti,kw OR 'PPA-L':ab,ti,kw OR 'mixed-PPA':ab,ti,kw OR 'mixed-variant PPA':ab,ti,kw OR 'fluent-PPA':ab,ti,kw OR 'fluent-variant PPA':ab,ti,kw OR 'expressive-PPA':ab,ti,kw OR 'expressive-variant PPA':ab,ti,kw OR 'motor-PPA':ab,ti,kw OR 'motor-variant PPA':ab,ti,kw OR 'anomic-PPA':ab,ti,kw OR 'anomic-variant PPA':ab,ti,kw OR 'global-PPA':ab,ti,kw OR 'global-variant PPA':ab,ti,kw OR 'sensory-PPA':ab,ti,kw OR 'sensory-variant PPA':ab,ti,kw OR 'dynamic-

PPA':ab,ti,kw OR 'dynamic-variant PPA':ab,ti,kw OR 'progressive anomia':ab,ti,kw OR 'progressive anomias':ab,ti,kw OR 'aphasic dementia':ab,ti,kw OR 'aphasic dementias':ab,ti,kw OR 'progressive speech disorder':ab,ti,kw OR 'progressive speech disorders':ab,ti,kw OR 'progressive aphemia':ab,ti,kw OR 'progressive aphasias':ab,ti,kw OR 'progressive anarthria':ab,ti,kw OR 'progressive anarthrias':ab,ti,kw OR 'progressive apraxia':ab,ti,kw OR 'progressive apraxias':ab,ti,kw OR 'progressive AOS':ab,ti,kw OR 'PPAOS':ab,ti,kw OR 'progressive dysarthria':ab,ti,kw OR 'progressive dysarthrias':ab,ti,kw OR (temporal-variant NEXT/2 frontotemporal dementia):ab,ti,kw OR (temporal-variant NEXT/2 FTD):ab,ti,kw OR 'tv-FTD':ab,ti,kw OR 'tvFTD':ab,ti,kw OR (temporal-variant NEXT/2 frontotemporal lobar degeneration):ab,ti,kw OR (temporal-variant NEXT/2 FTLD):ab,ti,kw OR 'tv-FTLD':ab,ti,kw OR 'tvFTLD':ab,ti,kw

AND

'early diagnosis'/exp OR 'early':ab,ti,kw OR 'earlier':ab,ti,kw OR 'earliest':ab,ti,kw OR 'mild':ab,ti,kw OR initial\*:ab,ti,kw OR 'first stage':ab,ti,kw OR 'first stages':ab,ti,kw OR 'first symptom':ab,ti,kw OR 'first symptoms':ab,ti,kw OR 'phase':ab,ti,kw OR 'phases':ab,ti,kw OR 'stage':ab,ti,kw OR 'stages':ab,ti,kw OR 'staging':ab,ti,kw OR 'onset':ab,ti,kw OR 'longitudinal study'/de OR 'longitudinal':ab,ti,kw OR 'disease course'/de OR 'progression':ab,ti,kw OR 'course':ab,ti,kw OR 'courses':ab,ti,kw OR 'trajectory':ab,ti,kw OR 'trajectories':ab,ti,kw OR 'follow up'/exp OR 'follow-up':ab,ti,kw OR 'followup':ab,ti,kw OR 'evolution':ab,ti,kw OR 'case study'/exp OR 'case report'/exp OR 'case':ab,ti,kw OR 'cases':ab,ti,kw OR 'assessment':ab,ti,kw OR 'assessments':ab,ti,kw OR 'test':ab,ti,kw OR 'tests':ab,ti,kw OR 'examination':ab,ti,kw OR 'examinations':ab,ti,kw OR 'evaluation':ab,ti,kw OR 'evaluations':ab,ti,kw OR 'description':ab,ti,kw OR 'descriptions':ab,ti,kw OR 'battery':ab,ti,kw OR 'batteries':ab,ti,kw OR 'profile':ab,ti,kw OR 'profiles':ab,ti,kw OR 'measure':ab,ti,kw OR 'measures':ab,ti,kw OR 'measurement':ab,ti,kw OR 'measurements':ab,ti,kw OR 'self-report':ab,ti,kw OR 'self-reports':ab,ti,kw OR 'interview':ab,ti,kw OR 'interviews':ab,ti,kw OR 'questionnaire':ab,ti,kw OR 'questionnaires':ab,ti,kw OR 'scale':ab,ti,kw OR 'scales':ab,ti,kw OR 'inventory':ab,ti,kw OR 'inventories':ab,ti,kw OR 'checklist':ab,ti,kw OR 'checklists':ab,ti,kw OR 'clinical assessment'/exp OR 'clinical examination'/exp OR 'clinical evaluation'/exp OR 'speech and language assessment'/exp OR 'language test'/exp OR 'Evoked Response'/exp OR 'potential':ab,ti,kw OR 'potentials':ab,ti,kw OR 'event-related response':ab,ti,kw OR 'event-related responses':ab,ti,kw OR 'evoked response':ab,ti,kw OR 'evoked responses':ab,ti,kw OR 'ERP':ab,ti,kw OR 'ERPs':ab,ti,kw OR 'P3':ab,ti,kw OR 'P300':ab,ti,kw OR 'mismatch':ab,ti,kw OR 'MMN':ab,ti,kw OR 'oddball':ab,ti,kw OR 'oddball':ab,ti,kw OR 'N400':ab,ti,kw OR 'anterior negativity':ab,ti,kw OR 'P600':ab,ti,kw OR 'positive shift':ab,ti,kw OR 'AEP':ab,ti,kw OR 'AEPs':ab,ti,kw OR 'P1':ab,ti,kw OR 'P100':ab,ti,kw OR 'N1':ab,ti,kw OR 'N100':ab,ti,kw OR 'P2':ab,ti,kw OR 'P200':ab,ti,kw OR 'N2':ab,ti,kw OR 'N200':ab,ti,kw OR 'Electroencephalography'/exp OR 'Electroencephalogram'/exp OR electroencephalogra\*:ab,ti,kw OR encephalogra\*:ab,ti,kw OR 'EEG':ab,ti,kw OR 'Magnetoencephalography'/exp OR magnetoencephalogra\*:ab,ti,kw OR 'MEG':ab,ti,kw OR 'Electrophysiology'/de OR electrophysiolog\*:ab,ti,kw OR 'Neurophysiology'/exp OR neurophysiolog\*:ab,ti,kw
