# Supplementary material
Source: publisher figshare collection journal article supplement (https://asha.figshare.com/articles/dataset/_/12798080)
Supplement: Supplementary file 2 [file 1]

### Supplemental Material S3. Demographic characteristics.

Demographic characteristics of the included behavioral and electrophysiological studies.

Table S1. Demographic characteristics of the cases in which initial complaints were reported and the cases in which language and speech assessments were administered.

|                              |        | Initial complaints |      |      |     | Initial assessments |      |      |      |
|------------------------------|--------|--------------------|------|------|-----|---------------------|------|------|------|
| Variant                      |        | All                | NFV  | SV   | LV  | All                 | NFV  | SV   | LV   |
| # cases                      |        | 152                | 44   | 37   | 11  | 82                  | 20   | 19   | 4    |
| # complaints or assessments  |        | 376                | 112  | 107  | 22  | 663                 | 260  | 154  | 40   |
| Sex                          | N      | 152                | 44   | 37   | 11  | 82                  | 20   | 19   | 4    |
|                              | Male   | 74                 | 21   | 13   | 6   | 41                  | 7    | 8    | 2    |
|                              | Female | 78                 | 23   | 24   | 5   | 41                  | 13   | 11   | 2    |
| Handedness                   | N      | 108                | 35   | 23   | 9   | 61                  | 17   | 12   | 3    |
|                              | Right  | 102                | 33   | 21   | 8   | 57                  | 16   | 10   | 3    |
|                              | Left   | 6                  | 2    | 2    | 1   | 4                   | 1    | 2    | 0    |
| Education (in years)         | N      | 29                 | 10   | 15   | 1   | 16                  | 7    | 6    | 2    |
|                              | Mean   | 10.8               | 8.3  | 12.9 | -   | 11.2                | 8    | 13.2 | 16.5 |
|                              | SD     | 5.2                | 3.3  | 5.8  | -   | 4.9                 | 3.1  | 5.4  | 2.1  |
| Age at onset (in years)      | N      | 139                | 39   | 29   | 11  | 75                  | 17   | 16   | 3    |
|                              | Mean   | 60.1               | 61.1 | 58.9 | 61  | 61.8                | 60.9 | 59.1 | 62.8 |
|                              | SD     | 9.3                | 9.5  | 6.9  | 7.5 | 8                   | 8.3  | 6.8  | 10.1 |
| Disease duration (in months) | N      | N/A                | N/A  | N/A  | N/A | 74                  | 16   | 16   | 3    |
|                              | Mean   | N/A                | N/A  | N/A  | N/A | 24.3                | 26.1 | 24.1 | 10.3 |
|                              | SD     | N/A                | N/A  | N/A  | N/A | 11.7                | 12.8 | 11.6 | 9.3  |
| Age (in years)               | N      | N/A                | N/A  | N/A  | N/A | 81                  | 19   | 19   | 4    |
|                              | Mean   | N/A                | N/A  | N/A  | N/A | 63.9                | 63.5 | 61   | 64.8 |
|                              | SD     | N/A                | N/A  | N/A  | N/A | 7.9                 | 8.1  | 7.2  | 8    |

Abbreviations: NFV = nonfluent variant; SV = semantic variant; LV = logopenic variant; # cases= number of cases, # number of initial complaints or assessments; N = total number; SD = standard deviation; N/A = not applicable.

Table S2. Demographic characteristics of the participants in the studies with group results in which initial complaints were reported.

| Reference                    |        | Karbe et al. (1993) | Pijnenburg et al. (2004) |     | Pozzebon et al. (2018) |      |      |
|------------------------------|--------|---------------------|--------------------------|-----|------------------------|------|------|
| Group                        |        | PPA                 | SV                       | NFV | SV                     | NFV  | LV   |
| # participants               |        | 10                  | 17                       | 8   | 6                      | 2    | 5    |
| Sex                          | Male   | 7                   | 11                       | 5   | 6                      | 1    | 5    |
|                              | Female | 3                   | 6                        | 3   | 0                      | 1    | 0    |
| Handedness                   | Right  | 10                  | -                        | -   | -                      | -    | -    |
|                              | Left   | 0                   | -                        | -   | -                      | -    | -    |
| Education (in years)         | Mean   | -                   | -                        | -   | -                      | -    | -    |
|                              | SD     | -                   | -                        | -   | -                      | -    | -    |
| Age at onset (in years)      | Mean   | 70.3                | -                        | -   | -                      | -    | -    |
|                              | SD     | 9                   | -                        | -   | -                      | -    | -    |
| Disease duration (in months) | Mean   | 2.3                 | -                        | -   | -                      | -    | -    |
|                              | SD     | -                   | -                        | -   | -                      | -    | -    |
| Age (in years)               | Mean   | 72.6                | -                        | -   | 76                     | 77   | 73.2 |
|                              | SD     | 8.4                 | -                        | -   | 6.5                    | 14.1 | 8.8  |

Abbreviations: NFV = nonfluent variant; SV = semantic variant; LV = logopenic variant; PPA = primary progressive aphasia; # participants = number of participants; SD = standard deviation.

Table S3. Demographic characteristics of the electrophysiological studies.

| Reference                    |        | Giaquinto & Ranghi (2009) |      | Hurley et al. (2009) |      | Hurley et al. (2012) |      |      | Grieder (2013) |      |
|------------------------------|--------|---------------------------|------|----------------------|------|----------------------|------|------|----------------|------|
| Group                        |        | PPA                       | HC   | PPA                  | HC   | NFV-LV               | SV   | HC   | SV             | HC   |
| # participants               |        | 1                         | 15   | 20                   | 15   | 24                   | 9    | 23   | 5              | 19   |
| Sex                          | Male   | 1                         | 8    | 12                   | 7    | 13                   | 4    | 11   | -              | -    |
|                              | Female | -                         | 7    | 8                    | 8    | 11                   | 5    | 12   | -              | -    |
| Handedness                   | Right  | 1                         | -    | 17                   | 20   | 22                   | 9    | 23   | -              | -    |
|                              | Left   | -                         | -    | 3                    | -    | 2                    | -    | -    | -              | -    |
| Education (in years)         | Mean   | -                         | 12.5 | 16.6                 | 16   | 16.2                 | 15.4 | 15.7 | 13.6           | 13.9 |
|                              | SD     | -                         | 2.5  | -                    | -    | 2                    | 2.7  | 2.6  | 2.9            | 3    |
| Age at onset (in years)      | Mean   | 68                        | N/A  | -                    | N/A  | -                    | -    | N/A  | -              | N/A  |
|                              | SD     | -                         | N/A  | -                    | N/A  | -                    | -    | N/A  | -              | N/A  |
| Disease duration (in months) | Mean   | 24                        | N/A  | >24                  | N/A  | >24                  | >24  | N/A  | -              | N/A  |
|                              | SD     | -                         | N/A  | -                    | N/A  | -                    | -    | N/A  | -              | N/A  |
| Age (in years)               | Mean   | 70                        | 65.1 | 62                   | 62.7 | 66.5                 | 62.3 | 63   | 65.8           | 69.5 |
|                              | SD     | -                         | 6.2  | 5.1                  | 6.2  | 8                    | 6.5  | 6.3  | 3.8            | 3.1  |

Abbreviations: NFV = nonfluent variant; SV = semantic variant; LV = logopenic variant; PPA = patient group with primary progressive aphasia; HC = healthy control group; # participants = number of participants; SD = standard deviation; N/A = not applicable.

## References

- Giaquinto, S., & Ranghi, F. (2009). Slowing of event-related potentials in primary progressive aphasia. A case report. *The Scientific World Journal*, 9, 633–638. <https://doi.org/10.1100/tsw.2009.67>
- Grieder, M., Crinelli, R. M., Jann, K., Federspiel, A., Wirth, M., Koenig, T., Stein, M., Wahlund, L.-O., & Dierks, T. (2013). Correlation between topographic N400 anomalies and reduced cerebral blood flow in the anterior temporal lobes of patients with dementia. *Journal of Alzheimer's Disease*, 36(4), 711–731. <https://doi.org/10.3233/JAD-121690>
- Hurley, R. S., Paller, K. A., Rogalski, E. J., & Mesulam, M.-M. (2012). Neural mechanisms of object naming and word comprehension in primary progressive aphasia. *Journal of Neuroscience*, 32(14), 4848–4855. <https://doi.org/10.1523/JNEUROSCI.5984-11.2012>
- Hurley, R. S., Paller, K. A., Wieneke, C. A., Weintraub, S., Thompson, C. K., Federmeier, K. D., & Mesulam, M.-M. (2009). Electrophysiology of object naming in primary progressive aphasia. *Journal of Neuroscience*, 29(50), 15762–15769. <https://doi.org/10.1523/JNEUROSCI.2912-09.2009>
- Karbe, H., Kertesz, A., & Polk, M. (1993). Profiles of language impairment in primary progressive aphasia. *Archives of Neurology*, 50(2), 193–201. <https://doi.org/10.1001/archneur.1993.00540020069020>
- Pijnenburg, Y. A. L., Gillissen, F., Jonker, C., & Scheltens, P. (2004). Initial complaints in frontotemporal lobar degeneration. *Dementia and Geriatric Cognitive Disorders*, 17(4), 302–306. <https://doi.org/10.1159/000077159>
- Pozzebon, M., Douglas, J., & Ames, D. (2018). Spousal recollections of early signs of primary progressive aphasia. *International Journal of Language & Communication Disorders*, 53(2), 282–293. <https://doi.org/10.1111/1460-6984.12347>
