# Supplementary material
Source: publisher figshare collection journal article supplement (https://asha.figshare.com/articles/dataset/_/12798080)
Supplement: Supplementary file 3 [file 1]

## Supplemental Material S2. Quality assessments and results.

The quality assessments and their results of the behavioral and electrophysiological studies.

Table S1. *Quality assessment of the behavioral studies.*

| <b>Research participants' description</b>     |                                                                                                                     | <b>/5</b>  |
|-----------------------------------------------|---------------------------------------------------------------------------------------------------------------------|------------|
| 1                                             | Were the characteristics of the research participants described?                                                    | /4         |
| 1.1                                           | <i>Sex</i>                                                                                                          | /0,5       |
| 1.2                                           | <i>Age</i>                                                                                                          | /0,5       |
| 1.3                                           | <i>Disease duration or age of symptom onset (in years)</i>                                                          | /0,5       |
| 1.4                                           | <i>Handedness</i>                                                                                                   | /0,5       |
| 1.5                                           | <i>Education (in years)</i>                                                                                         | /0,5       |
| 1.6                                           | <i>Native language</i>                                                                                              | /0,5       |
| 1.7                                           | <i>Medical, family or psychosocial history</i>                                                                      | /0,5       |
| 1.8                                           | <i>Limitations in activities of daily living</i>                                                                    | /0,5       |
| 2                                             | Were the initial complaints described from the patient's perspective or the perspective of their environment?       | /1         |
| <b>Method initial diagnostic assessments</b>  |                                                                                                                     | <b>/3</b>  |
| 3                                             | Were the methods of the diagnostic assessments described?                                                           | /3         |
| 3.1                                           | <i>Language and/or speech assessment(s)</i>                                                                         | /1         |
| 3.2                                           | <i>Neurological assessment</i>                                                                                      | /0,5       |
| 3.3                                           | <i>Neuropsychological assessment</i>                                                                                | /0,5       |
| 3.4                                           | <i>Brain imaging</i>                                                                                                | /0,5       |
| 3.5                                           | <i>Histopathologic or genetic assessment</i>                                                                        | /0,5       |
| <b>Results initial diagnostic assessments</b> |                                                                                                                     | <b>/4</b>  |
| 4                                             | Were the results of the diagnostic assessments described?                                                           | /2         |
| 4.1                                           | <i>Neurological assessment</i>                                                                                      | /0,5       |
| 4.2                                           | <i>Neuropsychological assessment</i>                                                                                | /0,5       |
| 4.3                                           | <i>Brain imaging</i>                                                                                                | /0,5       |
| 4.4                                           | <i>Histopathologic or genetic assessment</i>                                                                        | /0,5       |
| 5                                             | Were the results of the language and/or speech assessment(s) described?                                             | /1         |
| 5.1                                           | <i>Quantitative results</i>                                                                                         | /0,5       |
| 5.2                                           | <i>Qualitative results</i>                                                                                          | /0,5       |
| 6                                             | Is the description of the results detailed enough to determine the clinical variant of primary progressive aphasia? | /1         |
| <b>Total score</b>                            |                                                                                                                     | <b>/12</b> |

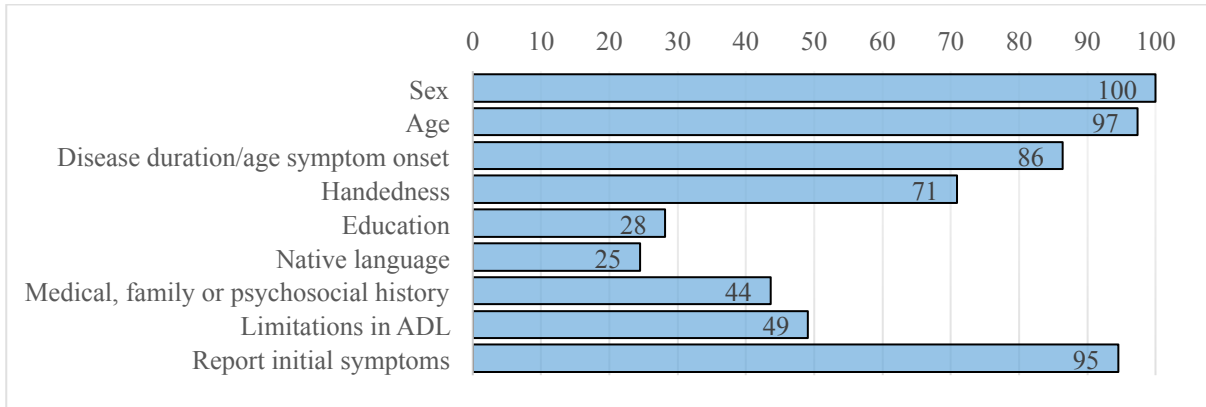

Figure S1. Quality of the description of research participants in the included behavioral studies. x-axis: percentage of included articles in which a specific question of the behavioral quality assessment was answered positively; y-axis: the question of the quality assessment.

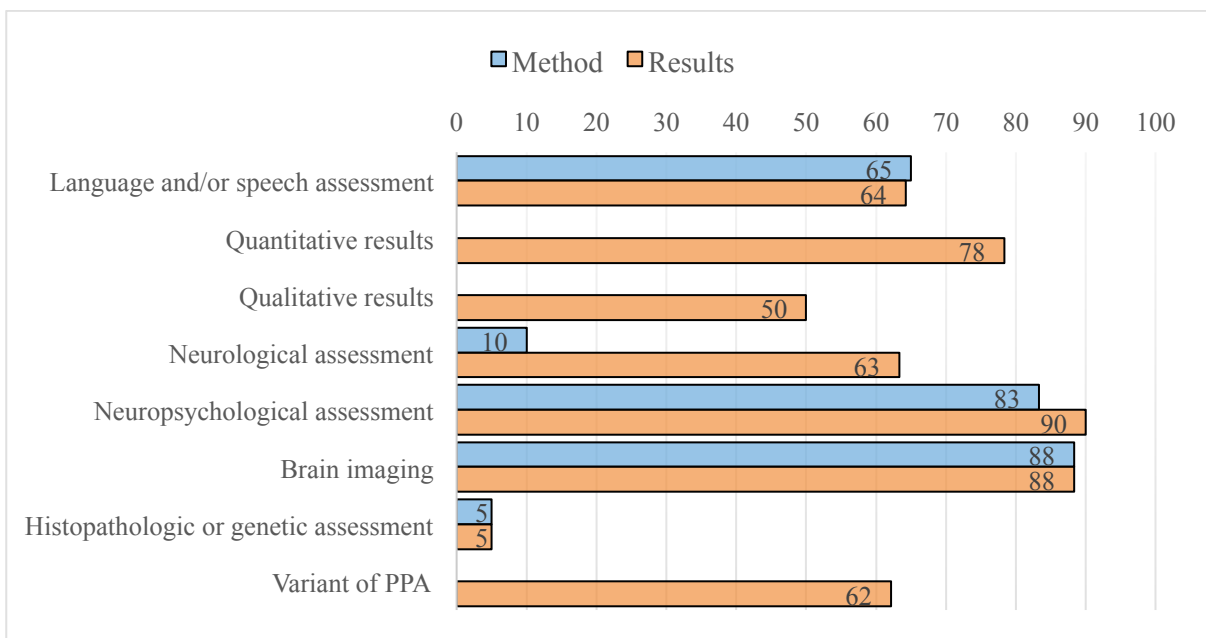

Figure S2. Quality of the method and the results of the initial diagnostic assessments in the included behavioral studies. x-axis: percentage of included articles in which a specific question of the behavioral quality assessment was answered positively; y-axis: the question of the quality assessment.

Table S2. *Quality assessment of the electrophysiological studies.*

| <b>Introduction</b> |                                                                                  | <b>/1</b>  |
|---------------------|----------------------------------------------------------------------------------|------------|
| 1                   | Was the research question or objective in this paper stated?                     | /1         |
| <b>Method</b>       |                                                                                  | <b>/9</b>  |
| 2                   | Were the characteristics of the research participants described?                 | /5         |
| 2.1                 | <i>Sex</i>                                                                       | /0,5       |
| 2.2                 | <i>Age</i>                                                                       | /0,5       |
| 2.3                 | <i>Disease duration or age of symptom onset (in years)</i>                       | /0,5       |
| 2.4                 | <i>Handedness</i>                                                                | /0,5       |
| 2.5                 | <i>Education (in years)</i>                                                      | /0,5       |
| 2.6                 | <i>Native language</i>                                                           | /0,5       |
| 2.7                 | <i>Description of the language and speech characteristics</i>                    | /1         |
| 2.8                 | <i>Variant of PPA</i>                                                            | /1         |
| 3                   | Was the electrophysiological measurement technique described?                    | /3         |
| 3.1                 | <i>Test procedure</i>                                                            | /1         |
| 3.2                 | <i>ERP data analysis</i>                                                         | /1         |
| 3.3                 | <i>Outcome variables</i>                                                         | /1         |
| 4                   | Were the statistical methods to analyze the electrophysiological data described? | /1         |
| <b>Results</b>      |                                                                                  | <b>/1</b>  |
| 5                   | Were the electrophysiological results described?                                 | /1         |
| <b>Discussion</b>   |                                                                                  | <b>/1</b>  |
| 6                   | Were the electrophysiological results interpreted?                               | /1         |
| <b>Total score</b>  |                                                                                  | <b>/12</b> |

Table S3. *Quality scores of the included electrophysiological studies.*

|                                                     | <b>Giaquinto<br/>(2009)</b> | <b>Grieder<br/>(2013)</b> | <b>Hurley<br/>(2009)</b> | <b>Hurley<br/>(2012)</b> |
|-----------------------------------------------------|-----------------------------|---------------------------|--------------------------|--------------------------|
| <b>1. Introduction (1)</b>                          | <b>1</b>                    | <b>1</b>                  | <b>1</b>                 | <b>1</b>                 |
| <b>Method (9)</b>                                   | <b>4.5</b>                  | <b>6.5</b>                | <b>7.5</b>               | <b>8</b>                 |
| 2. Research participants (5)                        | 3.5                         | 2.5                       | 3.5                      | 4                        |
| 2.1. <i>Sex (0,5)</i>                               | 0.5                         | 0                         | 0.5                      | 0.5                      |
| 2.2. <i>Age (0,5)</i>                               | 0.5                         | 0.5                       | 0.5                      | 0.5                      |
| 2.3. <i>Disease duration (0,5)</i>                  | 0.5                         | 0                         | 0                        | 0                        |
| 2.4. <i>Handedness (0,5)</i>                        | 0.5                         | 0                         | 0.5                      | 0.5                      |
| 2.5. <i>Education (0,5)</i>                         | 0                           | 0.5                       | 0.5                      | 0.5                      |
| 2.6. <i>Native language (0,5)</i>                   | 0.5                         | 0.5                       | 0.5                      | 0                        |
| 2.7. <i>Language and speech characteristics (1)</i> | 1                           | 0                         | 1                        | 1                        |
| 2.8. <i>Variant of PPA (1)</i>                      | 0                           | 1                         | 0                        | 1                        |
| 3. Measurement technique (3)                        | 1                           | 3                         | 3                        | 3                        |
| 3.1. <i>Test procedure (1)</i>                      | 1                           | 1                         | 1                        | 1                        |
| 3.2. <i>ERP data analysis (1)</i>                   | 0                           | 1                         | 1                        | 1                        |
| 3.3. <i>Outcome variables (1)</i>                   | 0                           | 1                         | 1                        | 1                        |
| 4. Statistical methods (1)                          | 0                           | 1                         | 1                        | 1                        |
| <b>5. Results (1)</b>                               | <b>0</b>                    | <b>1</b>                  | <b>1</b>                 | <b>1</b>                 |
| <b>6. Discussion (1)</b>                            | <b>0</b>                    | <b>1</b>                  | <b>1</b>                 | <b>1</b>                 |
| <b>Total score (12)</b>                             | <b>6.5</b>                  | <b>9.5</b>                | <b>10.5</b>              | <b>11</b>                |
